# Supplementary material for: A case study of the day-to-day occurrence of plasma irregularities in low-latitude ionosphere from multi-satellite observations
Source: Copernicus journal article supplement (doi:10.5194/angeo-2019-128), 2019-09-09
Supplement: Supplementary file 1 [file angeo-2019-128-supplement.pdf]

# The observations from ROCSAT-1 on 16 and 19 August 2003

On 16 August

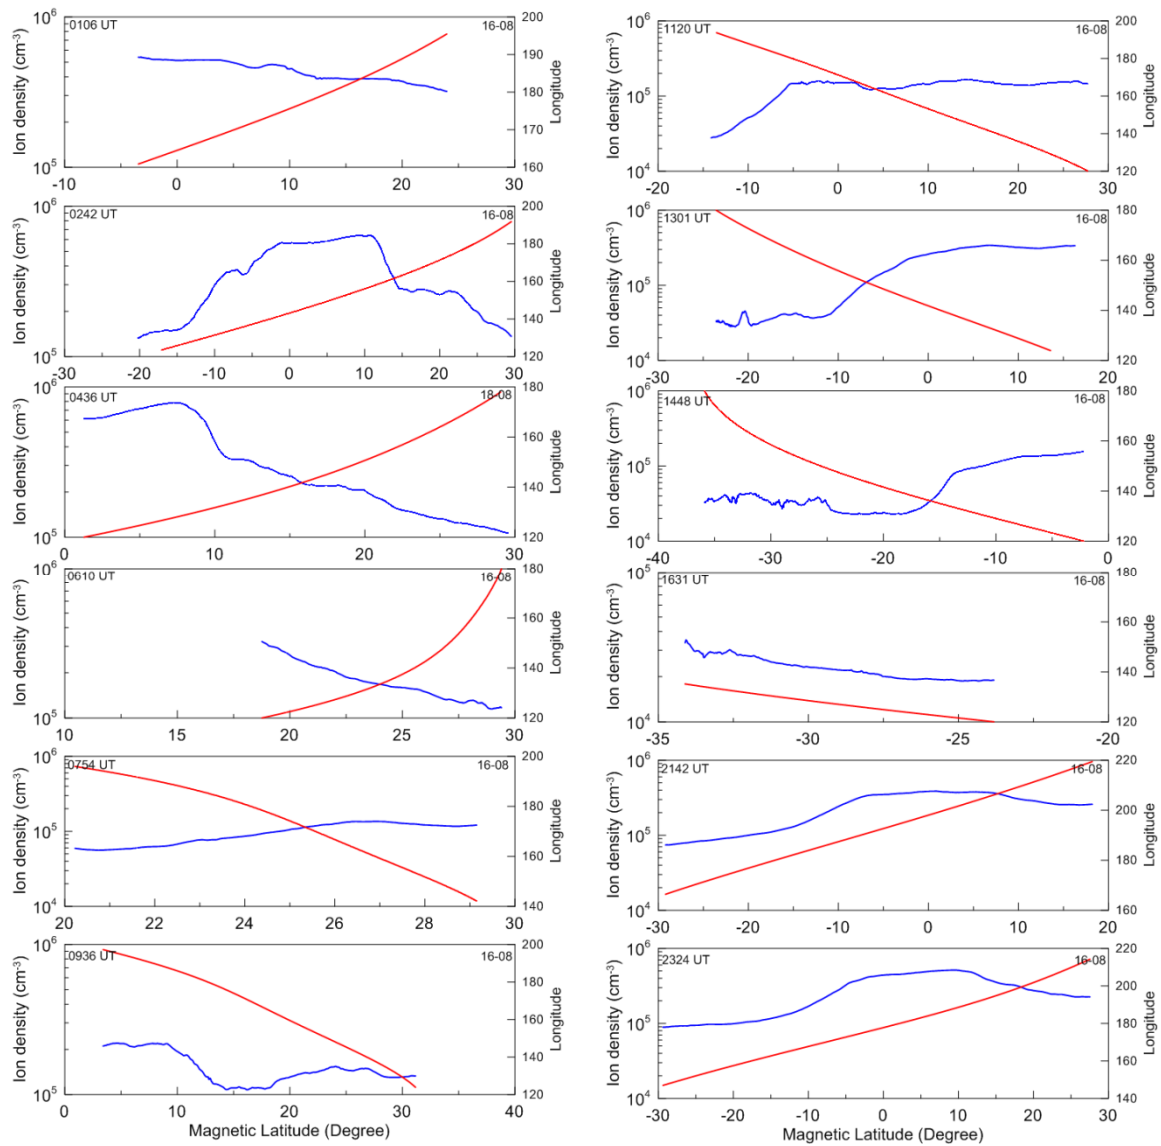

**Figure 1.** Variations of ion densities and longitudinal tracks along the ROCSAT-1 trajectories during successive times on 16 August in 170°E region

On 19 August

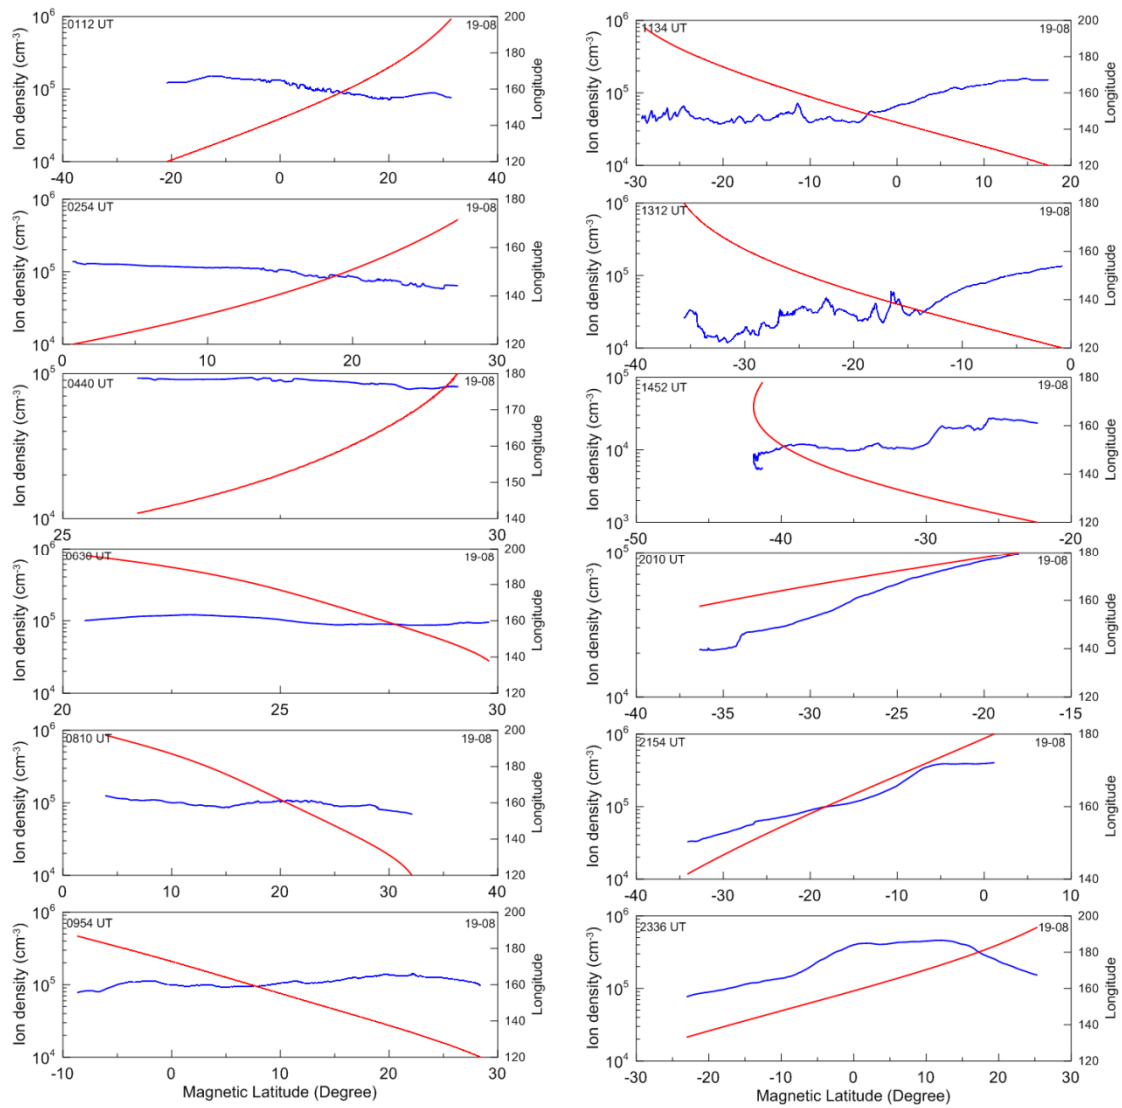

**Figure 2.** Variations of ion densities and longitudinal tracks along the ROCSAT-1 trajectories during successive times on 19 August in 170°E region
